# Supplementary material for: Polygenic scores for tobacco use provide insights into systemic health risks in a diverse EHR-linked biobank in Los Angeles
Source: bioRxiv or medRxiv preprint supplement (doi:10.1101/2023.02.05.23285493), 2023-02-09

**Supplementary Table 1 - TUD-PGS association with TUD across GIAs**

| GIA                     | $\beta$ | SE   | Z     | P> z     | [0.025 | 0.975] | OR   | OR_lower_CI | OR_upper_CI |
|-------------------------|---------|------|-------|----------|--------|--------|------|-------------|-------------|
| European American       | 0.18    | 0.02 | 10.44 | 1.66E-25 | 0.15   | 0.22   | 1.20 | 1.16        | 1.24        |
| Hispanic/Latin American | 0.17    | 0.04 | 4.73  | 2.24E-06 | 0.10   | 0.24   | 1.19 | 1.11        | 1.28        |
| East Asian American     | 0.17    | 0.05 | 3.10  | 1.93E-03 | 0.06   | 0.27   | 1.18 | 1.06        | 1.30        |
| African American        | 0.04    | 0.06 | 0.66  | 5.07E-01 | -0.08  | 0.16   | 1.04 | 0.93        | 1.17        |

**Supplementary Table 2 - TUD-PGS association with TUD across quintiles and GIAs**

| PGS_Quantile | Coeff | SE   | Z    | P> z     | [0.025 | 0.975] | OR   | OR_lower_CI | OR_upper_CI | GIA                     |
|--------------|-------|------|------|----------|--------|--------|------|-------------|-------------|-------------------------|
| 2            | 0.10  | 0.06 | 1.86 | 6.27E-02 | -0.005 | 0.21   | 1.11 | 0.99        | 1.24        | European American       |
| 3            | 0.22  | 0.06 | 3.95 | 7.70E-05 | 0.11   | 0.33   | 1.25 | 1.12        | 1.39        | European American       |
| 4            | 0.31  | 0.06 | 5.58 | 2.47E-08 | 0.20   | 0.42   | 1.36 | 1.22        | 1.52        | European American       |
| 5            | 0.52  | 0.06 | 9.45 | 3.25E-21 | 0.41   | 0.63   | 1.69 | 1.51        | 1.88        | European American       |
| 2            | 0.15  | 0.12 | 1.32 | 1.86E-01 | -0.07  | 0.38   | 1.17 | 0.93        | 1.47        | Hispanic/Latin American |
| 3            | 0.16  | 0.12 | 1.39 | 1.66E-01 | -0.07  | 0.39   | 1.18 | 0.94        | 1.48        | Hispanic/Latin American |
| 4            | 0.29  | 0.12 | 2.53 | 1.13E-02 | 0.07   | 0.52   | 1.34 | 1.07        | 1.68        | Hispanic/Latin American |
| 5            | 0.54  | 0.12 | 4.65 | 3.27E-06 | 0.31   | 0.76   | 1.71 | 1.36        | 2.14        | Hispanic/Latin American |
| 2            | 0.19  | 0.17 | 1.12 | 2.64E-01 | -0.15  | 0.53   | 1.21 | 0.86        | 1.70        | East Asian American     |
| 3            | 0.52  | 0.17 | 3.1  | 1.94E-03 | 0.19   | 0.85   | 1.69 | 1.21        | 2.35        | East Asian American     |

|   |       |      |       |          |       |      |      |      |      |                     |
|---|-------|------|-------|----------|-------|------|------|------|------|---------------------|
| 4 | 0.31  | 0.17 | 1.82  | 6.87E-02 | -0.02 | 0.65 | 1.37 | 0.98 | 1.91 | East Asian American |
| 5 | 0.47  | 0.17 | 2.76  | 5.77E-03 | 0.14  | 0.80 | 1.60 | 1.15 | 2.23 | East Asian American |
| 2 | -0.10 | 0.18 | -0.59 | 5.58E-01 | -0.45 | 0.24 | 0.90 | 0.63 | 1.27 | African American    |
| 3 | 0.01  | 0.18 | 0.06  | 9.49E-01 | -0.34 | 0.36 | 1.01 | 0.71 | 1.43 | African American    |
| 4 | 0.12  | 0.18 | 0.69  | 4.93E-01 | -0.23 | 0.48 | 1.13 | 0.79 | 1.62 | African American    |
| 5 | 0.02  | 0.18 | 0.10  | 9.18E-01 | -0.34 | 0.38 | 1.02 | 0.71 | 1.47 | African American    |

**Supplemental Figure 1a**

**DAG showing the relationship evaluated in the PGS-PheWAS meta-analysis**

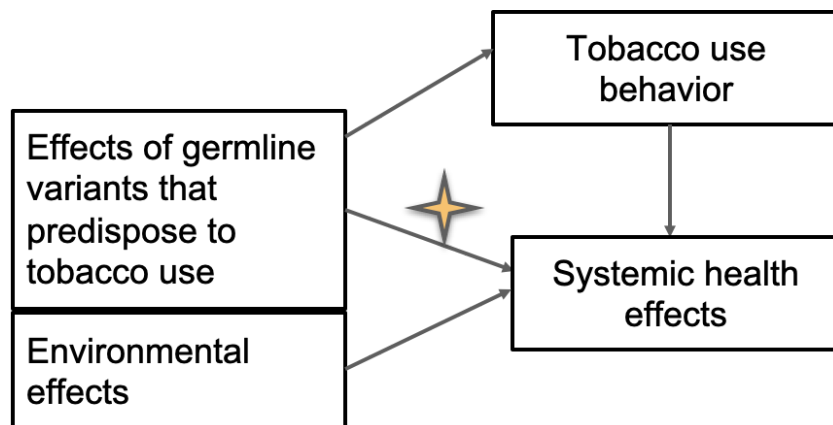

**Supplementary Table 3 - Significant associations between TUD-PGS and 1847 traits in the PGS-PheWAS cross-ancestry meta-analysis**

| Phecode | beta | SE   | Z    | P Value  | CI.LB | CI.UB | QEp  | Phenotype                         | Category            |
|---------|------|------|------|----------|-------|-------|------|-----------------------------------|---------------------|
| 278.11  | 0.12 | 0.02 | 6.06 | 1.38E-09 | 0.08  | 0.17  | 0.46 | Morbid obesity                    | endocrine/metabolic |
| 496.21  | 0.25 | 0.04 | 5.95 | 2.73E-09 | 0.17  | 0.33  | 0.10 | Obstructive chronic bronchitis    | respiratory         |
| 316     | 0.12 | 0.02 | 5.47 | 4.45E-08 | 0.08  | 0.16  | 0.56 | Substance addiction and disorders | mental disorders    |

|       |       |      |       |          |          |       |      |                                                             |                     |
|-------|-------|------|-------|----------|----------|-------|------|-------------------------------------------------------------|---------------------|
| 411   | 0.09  | 0.02 | 5.24  | 1.61E-07 | 0.05     | 0.12  | 0.81 | Ischemic Heart Disease                                      | circulatory system  |
| 228.1 | -0.10 | 0.02 | -5.09 | 3.49E-07 | -0.14    | -0.06 | 0.74 | Hemangioma of skin and subcutaneous tissue                  | neoplasms           |
| 428.1 | 0.12  | 0.02 | 5.03  | 4.80E-07 | 0.07     | 0.16  | 0.33 | Congestive heart failure (CHF) NOS                          | circulatory system  |
| 327.3 | 0.08  | 0.02 | 5.02  | 5.29E-07 | 0.05     | 0.11  | 0.23 | Sleep apnea                                                 | neurological        |
| 228   | -0.09 | 0.02 | -4.78 | 1.74E-06 | -0.13    | -0.05 | 0.76 | Hemangioma and lymphangioma, any site                       | neoplasms           |
| 411.3 | 0.12  | 0.03 | 4.53  | 5.83E-06 | 0.07     | 0.17  | 0.71 | Angina pectoris                                             | circulatory system  |
| 530   | 0.06  | 0.01 | 4.46  | 8.05E-06 | 0.03     | 0.09  | 0.31 | Diseases of esophagus                                       | digestive           |
| 428   | 0.09  | 0.02 | 4.42  | 9.57E-06 | 0.05     | 0.14  | 0.99 | Congestive heart failure; nonhypertensive                   | circulatory system  |
| 338.2 | 0.06  | 0.01 | 4.41  | 1.05E-05 | 0.03     | 0.09  | 0.38 | Chronic pain                                                | neurological        |
| 509   | 0.09  | 0.02 | 4.37  | 1.24E-05 | 0.04817  | 0.13  | 0.96 | Respiratory failure, insufficiency, arrest                  | respiratory         |
| 278.1 | 0.11  | 0.03 | 4.34  | 1.42E-05 | 0.064552 | 0.17  | 0.12 | Obesity                                                     | endocrine/metabolic |
| 411.2 | 0.11  | 0.03 | 4.34  | 1.45E-05 | 0.060558 | 0.16  | 0.67 | Myocardial infarction                                       | circulatory system  |
| 300   | 0.06  | 0.01 | 4.27  | 1.95E-05 | 0.031596 | 0.09  | 0.87 | Anxiety disorders                                           | mental disorders    |
| 508   | 0.07  | 0.02 | 4.24  | 2.23E-05 | 0.035846 | 0.097 | 0.53 | Pulmonary collapse; interstitial and compensatory emphysema | respiratory         |

**Supplemental Figure 1b**

**DAG showing the relationship evaluated in the PGS-PheWAS never-smoker analysis**

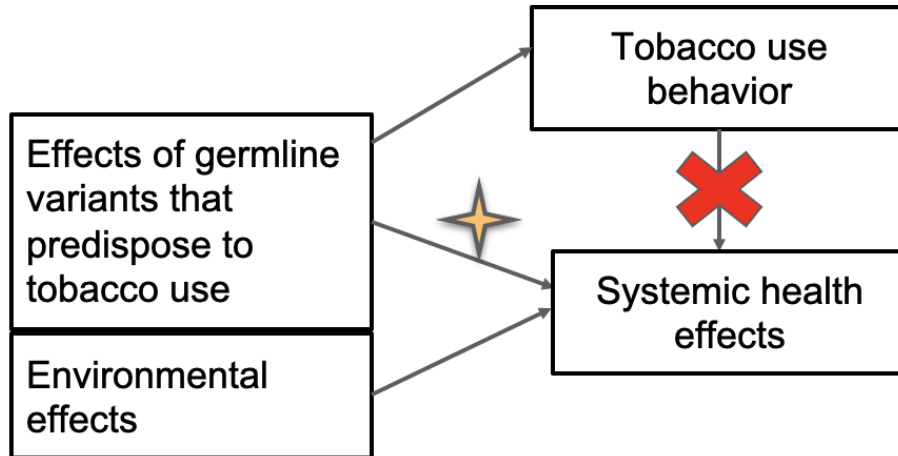

**Supplementary Table 4 - Significant associations between TUD-PGS and 1847 traits in the ‘never-smoker’ PGS-PheWAS in EA ancestry group**

| Phecode | Coef  | SE   | Z     | P Value  | [0.025 | 0.975] | Phenotype                             | Category            |  |
|---------|-------|------|-------|----------|--------|--------|---------------------------------------|---------------------|--|
| 278.1   | 0.13  | 0.03 | 5.09  | 3.54E-07 | 0.08   | 0.18   | Obesity                               | endocrine/metabolic |  |
| 317     | 0.23  | 0.05 | 4.8   | 1.61E-06 | 0.14   | 0.32   | Alcohol-related disorders             | mental disorders    |  |
| 721     | 0.12  | 0.03 | 4.79  | 1.64E-06 | 0.074  | 0.17   | Spondylosis and allied disorders      | musculoskeletal     |  |
| 278.11  | 0.16  | 0.03 | 4.70  | 2.56E-06 | 0.09   | 0.23   | Morbid obesity                        | endocrine/metabolic |  |
| 150     | 0.71  | 0.15 | 4.67  | 3.05E-06 | 0.41   | 1.01   | Cancer of esophagus                   | neoplasms           |  |
| 228     | -0.12 | 0.03 | -4.58 | 4.67E-06 | -0.17  | -0.07  | Hemangioma and lymphangioma, any site | neoplasms           |  |
| 317.1   | 0.23  | 0.05 | 4.29  | 1.78E-05 | 0.12   | 0.33   | Alcoholism                            | mental disorders    |  |
| 401     | 0.09  | 0.02 | 4.20  | 2.62E-05 | 0.05   | 0.14   | Hypertension                          | circulatory system  |  |

**Supplemental Figure 2**

**TUD-PGS association with Lung Cancer across PGS quintiles among ever smokers and never smokers**

Associations between TUD-PGS and lung cancer. X-axis represents the top 4 quintiles grouped by TUD-PGS. Y axis represents effect sizes represented by odds ratios. Red line indicates OR =1. A reverse trend from alcohol-related disorders and obesity is noted in lung cancer demonstrating a trend of higher ORs in ever-smokers compared to never-smokers, across the quintiles going from lowest to highest.

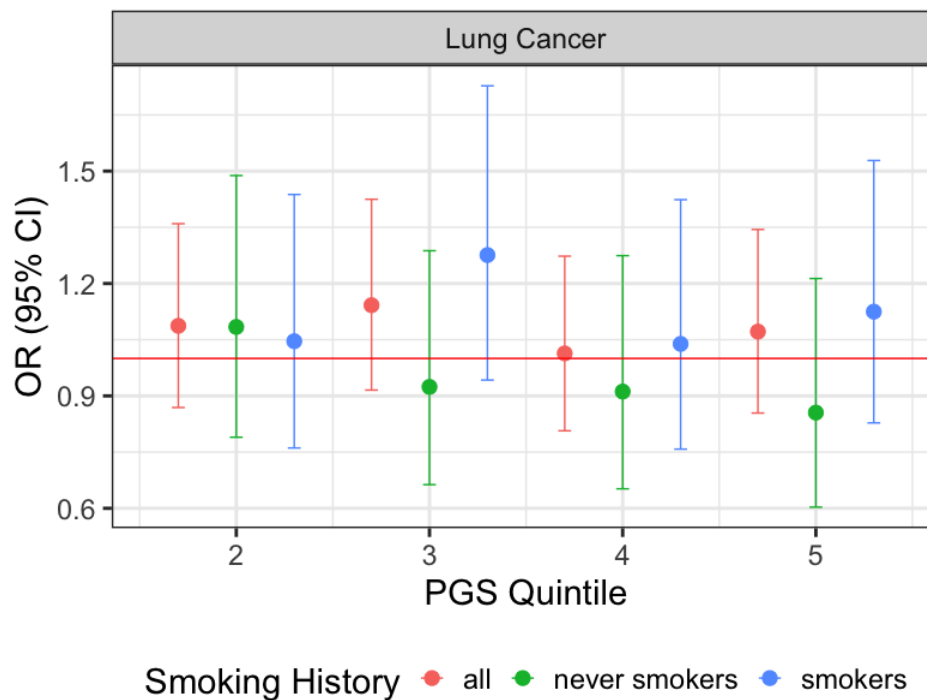

**Supplementary Table 5 - Associations between Alcohol-Related Disorders, Obesity, and Lung cancer and PGS quantiles traits in the 'ever-smoker' and 'never-smoker' groups**

| PGS_Quantile | Coef. | SE   | Z     | P> z     | [0.025 | 0.975] | Phcode | Smoking History | OR   | OR_Lower_CI | OR_Upper_CI | Phenotype |
|--------------|-------|------|-------|----------|--------|--------|--------|-----------------|------|-------------|-------------|-----------|
| 2            | 0.004 | 0.05 | 0.08  | 9.40E-01 | -0.095 | 0.10   | 278.1  | all             | 1.00 | 0.91        | 1.11        | Obesity   |
| 3            | 0.16  | 0.05 | 3.31  | 9.38E-04 | 0.07   | 0.26   | 278.1  | all             | 1.18 | 1.07        | 1.30        | Obesity   |
| 4            | 0.19  | 0.05 | 3.87  | 1.11E-04 | 0.09   | 0.29   | 278.1  | all             | 1.21 | 1.1         | 1.33        | Obesity   |
| 5            | 0.28  | 0.05 | 5.61  | 2.02E-08 | 0.18   | 0.37   | 278.1  | all             | 1.32 | 1.2         | 1.45        | Obesity   |
| 2            | 0.04  | 0.09 | 0.50  | 6.17E-01 | -0.13  | 0.22   | 278.1  | smokers         | 1.05 | 0.88        | 1.25        | Obesity   |
| 3            | 0.11  | 0.09 | 1.29  | 1.97E-01 | -0.06  | 0.28   | 278.1  | smokers         | 1.12 | 0.94        | 1.33        | Obesity   |
| 4            | 0.23  | 0.09 | 2.73  | 6.34E-03 | 0.07   | 0.40   | 278.1  | smokers         | 1.26 | 1.07        | 1.49        | Obesity   |
| 5            | 0.16  | 0.08 | 1.87  | 6.22E-02 | -0.008 | 0.32   | 278.1  | smokers         | 1.17 | 0.99        | 1.38        | Obesity   |
| 2            | -0.02 | 0.06 | -0.40 | 6.93E-01 | -0.15  | 0.1    | 278.1  | never smokers   | 0.98 | 0.86        | 1.10        | Obesity   |
| 3            | 0.18  | 0.06 | 2.95  | 3.22E-03 | 0.06   | 0.30   | 278.1  | never smokers   | 1.20 | 1.06        | 1.35        | Obesity   |
| 4            | 0.15  | 0.06 | 2.4   | 1.67E-02 | 0.027  | 0.27   | 278.1  | never smokers   | 1.16 | 1.03        | 1.31        | Obesity   |

|   |       |      |       |          |        |      |       |               |      |      |      |                           |
|---|-------|------|-------|----------|--------|------|-------|---------------|------|------|------|---------------------------|
| 5 | 0.32  | 0.06 | 5.33  | 9.73E-08 | 0.20   | 0.44 | 278.1 | never smokers | 1.38 | 1.23 | 1.56 | Obesity                   |
| 2 | 0.06  | 0.08 | 0.72  | 4.69E-01 | -0.10  | 0.22 | 317   | all           | 1.06 | 0.90 | 1.25 | Alcohol Related Disorders |
| 3 | 0.11  | 0.08 | 1.39  | 1.63E-01 | -0.05  | 0.27 | 317   | all           | 1.12 | 0.95 | 1.32 | Alcohol Related Disorders |
| 4 | 0.15  | 0.08 | 1.84  | 6.60E-02 | -0.009 | 0.31 | 317   | all           | 1.16 | 0.99 | 1.36 | Alcohol Related Disorders |
| 5 | 0.33  | 0.08 | 4.22  | 2.44E-05 | 0.18   | 0.49 | 317   | all           | 1.39 | 1.19 | 1.63 | Alcohol Related Disorders |
| 2 | -0.05 | 0.12 | -0.47 | 6.41E-01 | -0.29  | 0.18 | 317   | smokers       | 0.95 | 0.75 | 1.19 | Alcohol Related Disorders |
| 3 | 0.07  | 0.11 | 0.66  | 5.09E-01 | -0.15  | 0.30 | 317   | smokers       | 1.08 | 0.86 | 1.35 | Alcohol Related Disorders |
| 4 | -0.04 | 0.11 | -0.38 | 7.08E-01 | -0.27  | 0.18 | 317   | smokers       | 0.96 | 0.77 | 1.20 | Alcohol Related Disorders |
| 5 | 0.11  | 0.11 | 0.99  | 3.24E-01 | -0.11  | 0.32 | 317   | smokers       | 1.11 | 0.90 | 1.38 | Alcohol Related Disorders |
| 2 | 0.11  | 0.12 | 0.95  | 3.42E-01 | -0.12  | 0.35 | 317   | never smokers | 1.12 | 0.88 | 1.41 | Alcohol Related Disorders |
| 3 | 0.03  | 0.12 | 0.27  | 7.85E-01 | -0.21  | 0.27 | 317   | never smokers | 1.03 | 0.81 | 1.31 | Alcohol Related Disorders |
| 4 | 0.22  | 0.12 | 1.85  | 6.42E-02 | -0.01  | 0.45 | 317   | never smokers | 1.24 | 0.99 | 1.56 | Alcohol Related Disorders |
| 5 | 0.39  | 0.11 | 3.37  | 7.64E-04 | 0.16   | 0.61 | 317   | never smokers | 1.47 | 1.17 | 1.84 | Alcohol Related Disorders |
| 2 | 0.08  | 0.11 | 0.73  | 4.65E-01 | -0.14  | 0.31 | 165.1 | all           | 1.09 | 0.87 | 1.36 | Lung Cancer               |
| 3 | 0.13  | 0.11 | 1.18  | 2.39E-01 | -0.09  | 0.35 | 165.1 | all           | 1.14 | 0.91 | 1.42 | Lung Cancer               |
| 4 | 0.01  | 0.11 | 0.11  | 9.08E-01 | -0.21  | 0.24 | 165.1 | all           | 1.01 | 0.81 | 1.27 | Lung Cancer               |

|   |       |      |       |          |       |      |       |               |      |      |      |             |
|---|-------|------|-------|----------|-------|------|-------|---------------|------|------|------|-------------|
| 5 | 0.07  | 0.11 | 0.60  | 5.50E-01 | -0.16 | 0.30 | 165.1 | all           | 1.07 | 0.85 | 1.34 | Lung Cancer |
| 2 | 0.05  | 0.16 | 0.28  | 7.82E-01 | -0.27 | 0.36 | 165.1 | smokers       | 1.05 | 0.76 | 1.44 | Lung Cancer |
| 3 | 0.24  | 0.15 | 1.58  | 1.15E-01 | -0.06 | 0.55 | 165.1 | smokers       | 1.28 | 0.94 | 1.73 | Lung Cancer |
| 4 | 0.04  | 0.16 | 0.24  | 8.13E-01 | -0.28 | 0.35 | 165.1 | smokers       | 1.04 | 0.76 | 1.42 | Lung Cancer |
| 5 | 0.11  | 0.16 | 0.75  | 4.52E-01 | -0.19 | 0.42 | 165.1 | smokers       | 1.12 | 0.83 | 1.53 | Lung Cancer |
| 2 | 0.08  | 0.16 | 0.50  | 6.18E-01 | -0.24 | 0.40 | 165.1 | never smokers | 1.08 | 0.79 | 1.49 | Lung Cancer |
| 3 | -0.08 | 0.17 | -0.47 | 6.40E-01 | -0.41 | 0.25 | 165.1 | never smokers | 0.92 | 0.66 | 1.29 | Lung Cancer |
| 4 | -0.09 | 0.17 | -0.54 | 5.88E-01 | -0.43 | 0.24 | 165.1 | never smokers | 0.91 | 0.65 | 1.27 | Lung Cancer |
| 5 | -0.16 | 0.18 | -0.88 | 3.81E-01 | -0.51 | 0.19 | 165.1 | never smokers | 0.86 | 0.60 | 1.21 | Lung Cancer |

### Supplemental Figure 3

#### MR results between cigarettes smoked per day (GSCAN Consortium) and waist circumference (MRC-UBristol and UKBB) and body mass index (UKBB)

Mendelian Randomization results across multiple MR methods using summary statistics for cigarettes smoked per day from the GSCAN Consortium and for waist circumference from MRC-UBristol and body mass index from UKBB. X axis represents the effect sizes and Y axis represents the MR method used.

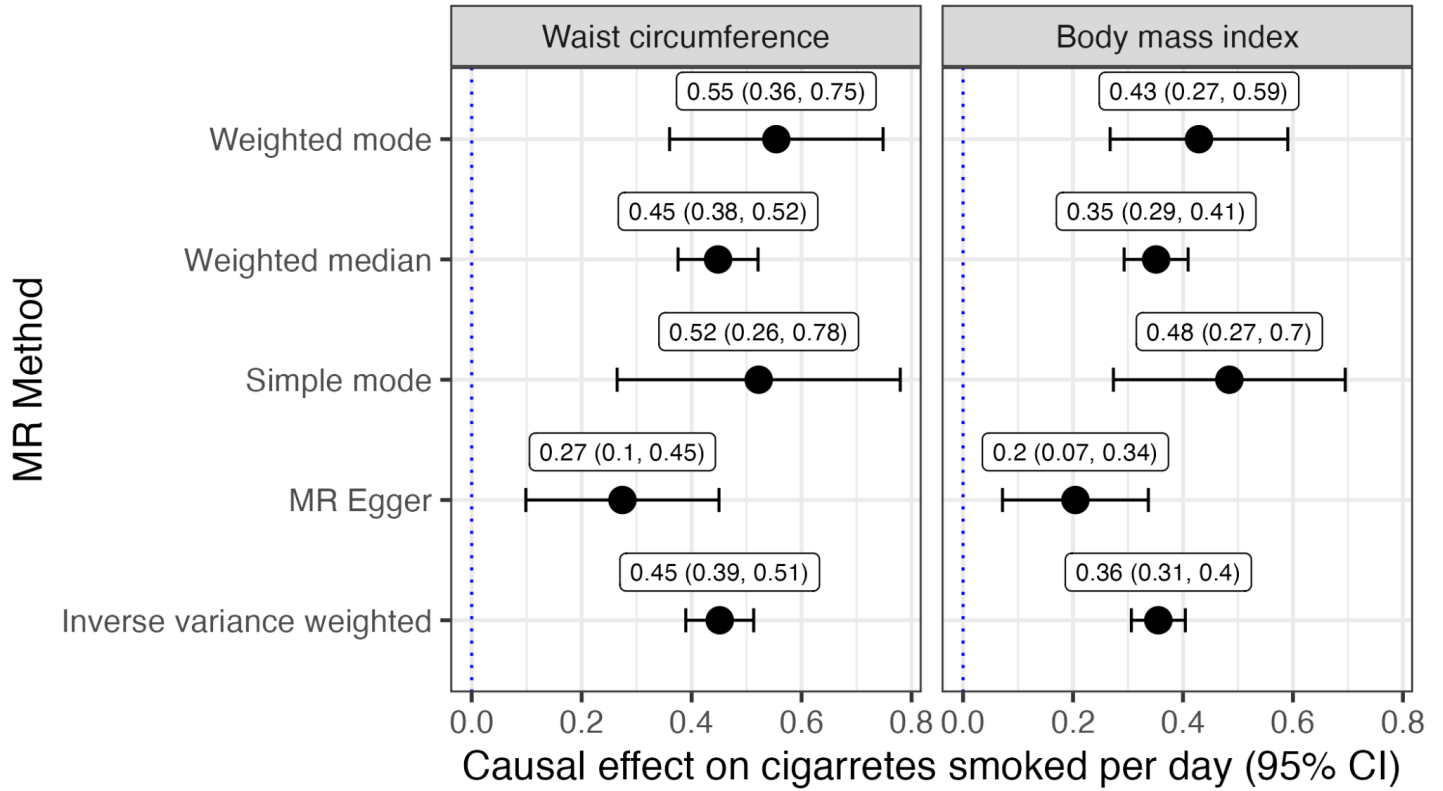

Supplement: Supplementary file [file media-1.pdf]
